1 **Physiotherapy Under Pressure: A Cross-Sectional Study on The Interplay Between**  
2 **Perfectionism, Moral Injury, and Burnout**

3 Dr Daniel Biggs DPT Lecturer, Academy of Sport and Wellbeing, University of Highlands  
4 and Islands, UHI Perth, Perth PH1 2NX

5 Department of Physiotherapy and Paramedicine, School of Health and Life Sciences,  
6 Glasgow Caledonian University, Glasgow G4 0BA

7

8 Dr Laura Blackburn DPT Lecturer, Department of Physiotherapy and Paramedicine, School  
9 of Health and Life Sciences, Glasgow Caledonian University, Glasgow G4 0BA

10 Cameron Black MSc MSK Physiotherapist, Occupational Health, Buckinghamshire  
11 Healthcare NHS Trust, Aylesbury HP21 8AL

12 Dr Sivaramkumar Shanmugam PhD Senior Lecturer, Department of Physiotherapy and  
13 Paramedicine, School of Health and Life Sciences, Glasgow Caledonian University, Glasgow  
14 G4 0BA

15

16 Corresponding Author

17 Dr Sivaramkumar Shanmugam PhD Senior Lecturer, Department of Physiotherapy and  
18 Paramedicine, School of Health and Life Sciences, Glasgow Caledonian University, Glasgow  
19 G4 0BA 0141 331 8870 [sivaram.shanmugam@gcu.ac.uk](mailto:sivaram.shanmugam@gcu.ac.uk)

20 **Physiotherapy Under Pressure: A Cross-Sectional Study on The Interplay Between**  
21 **Perfectionism, Moral Injury, and Burnout**

22 **Abstract**

23 **Background:** Given the escalating challenges for UK-based physiotherapists in workload  
24 pressures, budget constraints, staff shortages and patient wait times, the profession (of 65,000  
25 registered physiotherapists) requires immediate care and review of therapist health. This  
26 pioneering study aims to examine perfectionism, moral injury, and burnout among UK-based  
27 physiotherapists across the NHS, private practice, sports, and academia.

28 **Method:** This cross-sectional study utilised an online survey and implementation of Structure  
29 Equation Modelling (SEM) to assess the interplay of Perfectionism (Multidimension  
30 Perfectionism Scale-Short Form), Moral Injury (Moral Injury Symptoms Scale-Healthcare  
31 Professionals) and Burnout (Shirom-Melamed Burnout Questionnaire). Our sample size  
32 calculation shows representation of the UK physiotherapy profession via utilisation of 95%  
33 confidence interval with a 5% margin of error.

34 **Findings:** Our analysis conducted on (n=402) UK-based physiotherapists reveals significant  
35 burnout levels – 96% are categorised as moderate to high. Furthermore, associations and SEM  
36 of Perfectionism and Moral Injury collectively account for a substantial proportion of burnout  
37 variability ( $r^2.62$ ), highlighting their sequential impact on burnout manifestation.

38 **Interpretation:** With such high levels of burnout, urgent intervention is paramount. Elevated  
39 burnout presents challenges for the physiotherapy profession as staff retention, accurate and  
40 effective patient care, and overall health are severely impacted due to burnout. Recognising  
41 and addressing perfectionism and moral injury becomes pivotal to mitigate its impact on  
42 individual and collective health.

43 **Funding:** No funding was acquired for this research project.

44 **Keywords:** Perfectionism, Moral Injury, Burnout, Physiotherapy, Structural Equation

45 Modelling

## 46 Introduction

### 47 Perfectionism

48 Bayeux Tapestry encapsulates the essence of perfectionism through its intricate embroidery  
49 process, where each thread is meticulously woven to depict mediaeval scenes with precision.  
50 Embroiderers become immersed in a meticulous battle, fixated on capturing every intricate  
51 detail to ensure the tapestry emerges as a flawless masterpiece. Parallels between Bayeux  
52 Tapestry and perfectionism extends beyond the meticulous process to encompass the high  
53 standards of the creators. In both cases, there is commitment to achieving absolute flawlessness,  
54 be it the careful stitching of threads or the pursuits of perfection in one's work. Bayeux Tapestry  
55 thus serves as a tangible representation of the relentless pursuit of flawlessness, mirroring the  
56 psychology of perfectionism. Commonly acknowledged as an intricate multifaceted  
57 personality trait, perfectionism can be characterised by exceedingly high levels of self-critical  
58 judgement and personal standards, encompassing a synthesis of rigorous self-evaluative  
59 standards.<sup>1</sup>

60 Frost et al<sup>2</sup> outlined six dimensions of perfectionism. These encompassed Personal Standards,  
61 characterised by high internal expectations; Concerns Over Mistakes, reflecting apprehensions  
62 about errors; Parental Criticism, entailing critical evaluations/input from parents; Parental  
63 Expectations, involving demands of perceived flawlessness form parents; Doubts About  
64 Actions, encapsulating subjective uncertainty about performance; and Organisation,  
65 emphasising preparedness and methodicalness. The framework explores elevated self-  
66 expectations, maladaptive cognitive patterns related to mistakes, inward perfectionism,  
67 perceived parental pressure for flawlessness, subjective uncertainty about performance, and the

68 acknowledgement of the significance of preparedness and methodical approaches. An  
69 alternative perspective on perfectionism emerged from Hewitt and Flett's model<sup>3</sup>, which also  
70 posits perfectionism as multidimensional, but with three instead of six dimensions. These  
71 dimensions are Self Oriented Perfectionism (SOP), characterised by an inherent drive for  
72 flawlessness leading to self-criticism and high personal standards; Socially Prescribed  
73 Perfectionism (SPP), arising from external expectations from significant others like parents,  
74 guardians, coaches or teachers, resulting in excessive self-criticism when unmet; and Other  
75 Oriented Perfectionism (OOP), revolving around expecting perfection from others and  
76 manifesting in hyper-critical behaviour. The present study adopts the perspective of  
77 perfectionistic standards being viewed by the individual from the self and therefore renders  
78 OOP redundant to investigate with moral injury and burnout. Despite disparity in dimensions,  
79 common themes resonate between the two models, such as the imposition of high standards in  
80 both internal and external contexts and the presence of maladaptive cognitions during the  
81 pursuit and outcomes of goals. Literature favours Hewitt and Flett's model, drawn by its  
82 validation through factor analysis, supporting the existence of adaptive and maladaptive facets  
83 of perfectionism.<sup>4</sup>

84 A recent review focused on SPP, describing it as an epidemic.<sup>5</sup> Flett et al<sup>5</sup> showed the  
85 destructive nature of SPP through links with poor mental well-being, physical health,  
86 interpersonal adjustment, suicidal cognitions and tendencies, and burnout. The review stated,  
87 "SPP is a significant public health concern that urgently requires sustained prevention and  
88 intervention efforts".<sup>5(p1)</sup> As SPP is a pressure to meet external standards prescribed by the  
89 social environment, it may be problematic in certain settings and job roles, particularly when  
90 multiple factors contribute to decision-making. In the realm of healthcare, UK-based  
91 physiotherapists operate as independent practitioners across various sectors, such as public,  
92 private or sports settings. It is noteworthy that a significant majority, approximately 70% of

93 UK-based physiotherapists work in the NHS.<sup>6</sup> While these practitioners enjoy autonomy in  
94 their roles, it is important to recognise their independence is circumscribed by NHS procedures.  
95 Consequently, physiotherapists must carefully consider numerous factors when devising  
96 treatment plans. This poses a challenge for the physiotherapist, who must navigate the delicate  
97 balance of meeting the needs of patients whilst adhering to organisational demands. In essence,  
98 the practitioner is tasked with harmonising the diverse demands and standards of both the  
99 patient and the organisation. However, this intricate balancing act may introduce elements of  
100 unpredictability for the physiotherapist, with discrepancies arising among the therapist, patient,  
101 and the organisation, potentially compromising the practitioner's own professional needs and  
102 the innate perfection in their personality.

### 103 Moral Injury

104 Moral injury, rooted in the ethical branch of axiology and philosophy, revolves around an  
105 individual's view on what is right and what is wrong.<sup>7</sup> This form of injury often occurs when  
106 there is a perceived betrayal of moral integrity, from either someone of legitimate authority or  
107 oneself during a high-stakes situation.<sup>8</sup> Moral injury renders feelings of shame, remorse,  
108 meaninglessness, and grief due to the violation of core moral beliefs.<sup>9</sup> This deeply personal  
109 experience often shapes one's identity and the recognition of a breach in these beliefs becomes  
110 evident through the resultant moral injury.

111 A growing body of literature explores moral injury in healthcare professionals. The oath taken  
112 by healthcare practitioners, prioritising patient needs, serves as a guiding principle for their  
113 conduct and decisions.<sup>10</sup> However, competing factors such as insurance considerations,  
114 hospital dynamics, electronic medical records, the healthcare system model, and personal  
115 financial security can take precedence over patient well-being. Over time, decisions deviating  
116 from the best interests of patients can be perceived as a moral injustice, leading to feelings of  
117 shame and guilt. These emotions, in turn, may contribute to a desire to leave the healthcare

118 profession.<sup>11</sup> This parallels the concept of SPP, where the pursuit of flawless decisions and  
119 standards may be hindered by external factors, making the attainment of perfection seemingly  
120 unachievable.

121 Čartolovni et al<sup>12</sup> presents an alternative perspective to Dean and colleague's findings<sup>10</sup>,  
122 highlighting healthcare professionals encounter moral injury due to the discord between their  
123 duty to provide care, their fundamental professional role, and the witnessing of traumatising  
124 events that impose an ethical burden on them. This significantly impacts the mental health of  
125 healthcare professionals. Instances of trauma include the inadequate allocation of resources, a  
126 pervasive sense of hopelessness and helplessness in overcrowded hospitals, and the emotional  
127 toll of witnessing innocent deaths, resulting from moral decision-making in triage  
128 prioritisation.<sup>12</sup> This underscores that moral injury is not a uniform experience; rather,  
129 healthcare professionals face vulnerability arising from various aspects of their roles in the job.

130 Moral injury must be clearly distinguished from Post-Traumatic Stress Disorder (PTSD), this  
131 differentiation is crucial in the healthcare context, where the focus lies on understanding how  
132 moral injury arises, from the frustration experienced by healthcare professionals. Although  
133 these individuals are trained to provide care, they encounter barriers leading to an inability to  
134 deliver the expected care. This discrepancy can result in various adverse psychological  
135 outcomes, including burnout. Notably, research has demonstrated a correlation between  
136 burnout and moral injury.<sup>13</sup> Recognising and appreciating these distinctions is important for  
137 healthcare practitioners and researchers, as it sheds light on the unique challenges posed by  
138 moral injury, and the resultant repercussions in healthcare settings.

### 139 **Burnout**

140 A syndrome with far-reaching consequences, burnout affects not only the well-being and  
141 performance of individuals but also organisational outcomes, such as employee turnover,

142 absenteeism, and diminished productivity.<sup>14</sup> Three core dimensions of exhaustion, cynicism,  
143 and loss of commitment albeit with subtle changes are conceptualised by Maslach and  
144 Jackson.<sup>15</sup> These authors show burnout as a tri-dimensional syndrome, encompassing  
145 Emotional and Psychophysical Exhaustion, linked to somatic-like symptoms, such as tiredness  
146 or headaches; Depersonalisation, involving the tendency to detach oneself from society and  
147 societal values; and Reduced Sense of Accomplishment, indicating an adverse appraisal of  
148 individual abilities or achievements. Since the inception of this model, various others have been  
149 developed and grounded in the three dimensions of Maslach and Jackson's model.<sup>15</sup>

150 The Shirom-Melamed Burnout Measure (SMBM) for has been used in various studies.<sup>16</sup>  
151 Validated through confirmatory factor analysis<sup>16</sup>, the SMBM is characterised by three  
152 dimensions: emotional exhaustion (EE), physical fatigue (PE) and cognitive weariness (CW).  
153 Whether researchers employ Maslach and Jackson's model or the SMBM model, burnout onset  
154 is influenced by a range of factors at the individual (micro), occupational (meso), and  
155 organisational (macro) levels. These factors, encompassing high job demands, insufficient  
156 resources and support, a lack of autonomy and control, role ambiguity, and interpersonal  
157 conflicts are further influenced by the interaction of personality traits, coping styles, and prior  
158 experiences, shaping the emergence and progression of burnout.<sup>17</sup>

159 Donohoe et al<sup>18</sup> pioneered the measurement of burnout in physiotherapists, revealing 40%  
160 experienced moderate-to-high levels of burnout. Subsequent studies consistently delved into  
161 the phenomenon of burnout in physiotherapists, reinforcing the vulnerability of  
162 physiotherapists to burnout.<sup>19</sup> It is important to note these studies span various countries with  
163 different healthcare systems, and the impact of contributing factors may vary across contexts.  
164 Nevertheless, the collective evidence indicates burnout is a prevalent and significant issue  
165 among physiotherapists, reaching moderate-to-high levels across diverse settings.

166 Literature on burnout in physiotherapists spans different countries and continues to centre on  
167 prevalence. However, there is a notable absence of research on burnout in UK physiotherapists.  
168 Investigating this aspect is crucial for advancing our understanding and allowing for  
169 international and interdisciplinary comparisons. It also provides an opportunity to examine  
170 burnout within the context of the UK healthcare system, particularly post-pandemic.

### 171 [Perfectionism, Moral Injury and Burnout](#)

172 Research highlights links between perfectionism, moral injury, and burnout.<sup>13,20</sup> For example,  
173 Testoni et al<sup>13</sup> found a relationship ( $r = .20$ ,  $p = <.001$ ) between moral injury and burnout in  
174 clinicians. This finding is important as clinicians tend to dehumanise patients and colleagues  
175 during high levels of burnout, when high levels of exposure to moral injury occurred (ibid).  
176 Martin et al<sup>20</sup> found perfectionism to significantly predict emotional exhaustion ( $\beta = 0.55$ ,  $p =$   
177  $<.001$ ) and depersonalisation ( $\beta = 0.18$ ,  $p = .006$ ) in physicians, while Biggs, McKay and  
178 Shanmugam<sup>21</sup> showed SPP to be associated with burnout ( $\beta = 0.36$ ,  $p = .001$ ) in physiotherapy  
179 students, suggesting perfectionism renders the person vulnerable to burnout. Against this  
180 backdrop, we argue the tendency to achieve perfection in the workplace adversely affects  
181 performance, placing individuals at risk of burnout.

182 The intersection between perfectionism and moral injury is of particular interest, especially in  
183 how SPP might interact with moral injury. One plausible hypothesis is SPP, the dimension of  
184 perfectionism aimed at meeting the standards set by significant others, could lead to feelings  
185 of betrayal, subsequently triggering moral injury. To the authors' knowledge, perfectionism  
186 and moral injury have not been investigated together. However, it seems logical SPP could  
187 serve as a predictor of moral injury. The relationship between perfectionism, burnout and moral  
188 injury has also not been explored. Given the established associations of both perfectionism and  
189 moral injury with burnout in the literature<sup>13,20</sup>, and considering perfectionism predicts moral  
190 injury, it is reasonable to infer a connection between these variables. These three variables,



191 despite limited research, each demonstrated statistical significance in healthcare professionals  
192 worldwide, with no data, however, pertaining to perfectionism, moral injury and burnout in  
193 UK-based physiotherapists. This study aims to be the first to comprehensively examine these  
194 three variables among UK-based physiotherapists. We anticipate, firstly, a significant  
195 association between perfectionism and moral injury with burnout. Secondly, perfectionism, we  
196 expect, will predict moral injury, and in turn burnout. Therefore, this investigation aims to  
197 understand the nature and extent of the relationship between perfectionism, moral injury and  
198 burnout in UK-based Physiotherapists.

## 199 Method

### 200 Methodology

201 In this research, we followed the "Strengthening the Reporting of Observational Studies in  
202 Epidemiology" (STROBE) guidelines (von Elm et al. 2008). Our study specifically utilized the  
203 cross-sectional study version of the STROBE Checklist, incorporating 22 key points for survey  
204 design and result reporting, as detailed in Supplementary Table 1.

205 **Table 1: Categorisation of Physiotherapy Positions**

| Categorisation of Participants | Number within the field | Percentage |
|--------------------------------|-------------------------|------------|
| Band 5 NHS                     | 52                      | 13         |
| Band 6 NHS                     | 91                      | 23         |
| Band 7 NHS                     | 129                     | 32         |
| Band 8a                        | 55                      | 14         |
| Band 8b                        | 17                      | 4          |
| Band 8c                        | 3                       | <1         |
| Band 8d                        | 1                       | <1         |
| Private Practice               | 35                      | 9          |
| Sports-Based                   | 3                       | <1         |
| Lecturer                       | 5                       | 1          |
| Senior Lecturer                | 7                       | 2          |
| Reader                         | 1                       | <1         |
| Other                          | 3                       | <1         |

206 **Table 2. Frequency and Percentage of the Key Demographics**

| <b>Demographics</b>                        |           |
|--------------------------------------------|-----------|
| <b>Gender</b>                              |           |
| Female                                     | 330 (82%) |
| Male                                       | 67 (17%)  |
| Non-binary                                 | 1 (<1%)   |
| Prefer not to say                          | 4 (1%)    |
| <b>Age</b>                                 |           |
| 21-24 years                                | 29 (7%)   |
| 25-29 years                                | 40 (10%)  |
| 30-34 years                                | 52 (13%)  |
| 35-39 years                                | 71 (18%)  |
| 40-44 years                                | 77 (19%)  |
| 45-49 years                                | 55 (14%)  |
| 50+ years                                  | 78 (19%)  |
| <b>Ethnicity</b>                           |           |
| Asian or Asian British                     | 28 (7%)   |
| Black, Black British, Caribbean or African | 8 (2%)    |
| Mixed or Multiple Ethnic Groups            | 18 (4%)   |

|                        |           |
|------------------------|-----------|
| White                  | 348 (87%) |
| <hr/>                  |           |
| <b>Education</b>       |           |
| <hr/>                  |           |
| BSc                    | 191 (48%) |
| MSc                    | 164 (41%) |
| PhD                    | 22 (5%)   |
| Professional Doctorate | 1 (<1%)   |
| DPT                    | 8 (2%)    |
| PgDip                  | 13 (3%)   |
| MRes                   | 3 (1%)    |
| <hr/>                  |           |

207 Bachelor of Science. MSc = Master of Science. PhD = Doctor of Philosophy. DPT = Doctor  
208 of Physiotherapy. PgDip = Postgraduate Diploma. MRes = Master of Research.

## 209 Measures

210 Participants completed a Microsoft (MS) Forms survey which consisted of 12 questions related  
211 to demographics and work environment as well as three validated scales, measuring  
212 perfectionism, moral injury, and burnout in the profession. Perfectionism was measured via the  
213 Multidimensional Perfectionism Scale Short Form<sup>4</sup> (MPS-SF), which measures the  
214 aforementioned dimensions of SOP and SPP. Moral Injury was measured via Moral Injury  
215 Symptoms Scale- Healthcare Professionals Version (MISS-HF).<sup>22</sup> Due to limitations on the  
216 website hosting the survey, the Likert scale used to measure moral injury required modification  
217 from 10 levels to 7. Finally, Burnout was measured via the Shirom-Melamed Burnout  
218 Questionnaire<sup>23</sup> using the domains of EE, PF, and CW. The Likert scale used to measure  
219 burnout also required modification to fit the website hosting the survey from a Likert of 7 to 5.

## 220 Procedure

221 Participants found the survey through links on posts from the investigators' social media  
222 accounts or through recruitment emails. By clicking on the link, participants are directed to the  
223 MS Forms website where they can complete the questions.

## 224 Ethics

225 Informed consent was implied in the participation of the survey. The survey preamble  
226 explicitly stated the purpose of the study, assured anonymity and confidentiality, and  
227 emphasized the voluntary nature of participation. Further information was provided in a  
228 participant information sheet. In the first question, participants were informed that by  
229 proceeding with the survey, they were providing consent to utilize their responses for  
230 research purposes. If they opted yes, they go forward with the completion of the survey and if  
231 they opted no, they would exit the survey. The start date of recruitment was 25 November  
232 2022 and the end date 30 April 2023. They were informed of contact details for the research  
233 team and potential emotional impact. Post-survey, resources for mental health support were  
234 provided. Ethical approval was obtained from Glasgow Caledonian University's School of  
235 Health and Life Sciences (HLS/PSWAHS/22/017).

## 236 Data Analysis and Study Size

237 Preliminary, descriptive, and correlation analysis were conducted in SPSS 26.0. Scores were  
238 categorised as low, medium, and high by dividing the highest possible score for each measure  
239 into three parts. Preliminary analysis comprised out-of-range values, univariate, and  
240 multivariate normality, and reliability. Two-step structural equation modelling (SEM) was  
241 undertaken in AMOS 26.0.<sup>24</sup> Maximum likelihood estimation was employed to access the  
242 goodness-of-fit and parameters of the statistical model. The model included four interrelated  
243 latent variables: SSP, SOP, moral injury, and burnout. Burnout was indicated by three

244 dimensions (EE, PF, and CW) and moral injury, SOP and SPP were indicated by their  
245 respective items. This approach enabled the power analysis calculation of the model that  
246 showed 95% confidence interval with a 5% margin of error within the sample and shows  
247 representation of the UK Physiotherapist population. The Structure Equation Model  
248 assessment progressed sequentially, starting with measurement model evaluation, followed by  
249 confirmatory factor analyses. Subsequently the theorised structural relationships were  
250 evaluated. Conventional criteria of approximate markers of acceptance ( $\chi^2/df$  ratio < 3.00, IFI  
251 and CFI > 0.90, RMSEA < 0.08) and excellent fit ( $\chi^2/df$  ratio < 2.00, IFI and CFI > 0.95,  
252 RMSEA < 0.06) as recommended by Marsh et al.<sup>25</sup>

## 253 Results

### 254 Participants

255 Between October 2022 and February 2023, 402 UK-based physiotherapists completed an  
256 online survey. Participants were categorised as: Private Physiotherapists (9%), NHS Public  
257 Physiotherapists (87%), Sports (<1%), Academia (3%) and Other (<1%) (see Table 1).  
258 Participants worked in a range of clinical and non-clinical physiotherapy environments and  
259 specialties, including inpatient, outpatient, and higher education. Participants reported different  
260 duration of employment, with 23% working 2-5 years, 21% over 10 years, and 19% 12-24  
261 months in their current position. See table 2 for an overview of demographics, including gender,  
262 ethnicity, and education. Recruitment occurred through convenience sampling, advertising  
263 through social media and through emails with an invitation to complete the survey. Inclusion  
264 criteria included participants 21 years of age or over and work as a physiotherapist in the United  
265 Kingdom.

266 Preliminary Analyses, Descriptive Statistics, and Bivariate Correlations

267 Table 3 presents the average (mean), variance (standard deviation), correlation (Pearsons), and  
 268 level of significance for each total of the MPS-SF (excluding other oriented perfectionism),  
 269 MISS-HF, and SMBQ domains. For the SOP and SPP domains of the MPS-SF, the highest  
 270 total score possible is 35. The highest total score possible for the MISS-HF is 70. SMBQ  
 271 highest possible total score is 70 while the highest scores for each domain include 42 for PE,  
 272 21 for EE, and 35 for CW. All values lay within the expected range of the scale. No data was  
 273 missing due to the requirement in the survey for participants to complete each question. Data  
 274 for all scales fit normal distribution models of absolute skewness and absolute kurtosis.

275 **Table 3. Mean, standard deviation, and correlations of the three outcome measures**

|   | 1.SOP | 2.SPP  | 3.Moral Injury | 4.Physical Exhaustion | 5.Emotional Exhaustion | 6.Cognitive Weariness | 7.Total Burnout | Mean | SD  |
|---|-------|--------|----------------|-----------------------|------------------------|-----------------------|-----------------|------|-----|
| 1 |       | .576** | .291**         | .535**                | .124*                  | .240*                 | .108*           | 25.2 | 6.8 |
| 2 |       |        | .482**         | .540**                | .346**                 | .397**                | .336**          | 22.4 | 6.7 |
| 3 |       |        |                | .504**                | .461**                 | .432**                | .559**          | 34.7 | 8.4 |
| 4 |       |        |                |                       | .473**                 | .641**                | .886**          | 21.5 | 5.8 |
| 5 |       |        |                |                       |                        | .514**                | .727**          | 7.3  | 7.3 |
| 6 |       |        |                |                       |                        |                       | .873**          | 15.2 | 5   |
| 7 |       |        |                |                       |                        |                       |                 | 44.1 | 12  |

276 *Note.* Cronbach Alpha - SOP .84, SPP .90, Moral Injury .74, Burnout .94  
 277 Sig level \* .05. \*\* .01. SOP= socially oriented perfectionism. SPP = socially prescribed  
 278 perfectionism.

279 All correlations between the total and domain total scores for each scale were found to be  
 280 significant (see table 3). Table 4 highlights the percentages of the sample by category level in  
 281 outcome scores. As can be seen, 95% of physiotherapists experienced moderate-to-high levels  
 282 of SOP, 92% had moderate-to-high levels of SPP, 90% had moderate-to-high levels of moral  
 283 injury, and 96% had moderate-to-high levels of burnout.

284 **Table 4 Population Percentage by Category Level Proportion in Each Outcome Measure**

| Level    | Self-oriented Perfectionism | Socially Perfection | Prescribed | Moral Injury | Burnout |
|----------|-----------------------------|---------------------|------------|--------------|---------|
| Low      | 5%                          | 8%                  |            | 10%          | 4%      |
| Moderate | 33%                         | 54%                 |            | 84%          | 56%     |
| High     | 62%                         | 38%                 |            | 6%           | 40%     |

285

## 286 Structural Equation Modelling

287 Confirmatory factor analyses indicated acceptable-to-excellent fit for the measurement model  
288 ( $\chi^2/df$  ratio = 2.25, IFI = 0.92, CFI = 0.92, RMSEA = 0.06 CI 0.06-0.07). Composite  
289 reliabilities ( $\rho_c$ ) supported the measurement model: SOP = 0.90; SPP = 0.84; Moral Injury =  
290 0.74 and Burnout = 0.94. Structural Equation Modelling also indicated an acceptable-to-  
291 excellent fit ( $\chi^2/df$  ratio = 2.25, IFI = 0.92, CFI = 0.92, RMSEA = 0.06 CI 90% 0.06-0.07,  
292 SRMR = .067). All residual covariances were < 2.0 Overall, the model explained 62% variance  
293 in burnout. Parameters are displayed in Figure 1.



294

295

296

297 Figure 1. Structural equation model to show the relationship between perfectionism, moral injury and burnout.

## 298 Discussion

299

300 Our study sought to explore the relationship between perfectionism, moral injury, and burnout  
301 in physiotherapists based in the UK, through both correlation analyses and SEM techniques.  
302 We found a substantial proportion of variability in burnout can be accounted for by  
303 perfectionism and moral injury. As expected, we uncovered noteworthy positive relationships  
304 between SPP-Burnout, SPP-Moral Injury, and Moral Injury-Burnout. Notably, a statistically  
305 significant pathway emerged from perfectionism (SPP) to moral injury, and subsequently to  
306 burnout. This underscores two crucial findings. Firstly, perfectionism and moral injury  
307 exhibited meaningful associations with burnout. Secondly, perfectionism served as a precursor  
308 to moral injury, which in turn predicted burnout.

309 In essence, our study not only establishes the existence of significant relationships among  
310 perfectionism, moral injury, and burnout but also shows a sequential pattern wherein  
311 perfectionism sets the stage for moral injury, ultimately contributing to the manifestation of  
312 burnout.

### 313 Burnout in Physiotherapy

314

315 96% of physiotherapists in our sample suffered from moderate-to-high levels of burnout,  
316 presenting a pervasive challenge. Implications of these scores are concerning for several  
317 reasons. When considering our study and the research by Donohoe et al<sup>18</sup> who found 40% of  
318 physiotherapists suffered moderate to high burnout levels, our burnout levels reveal a marked  
319 increase. These heightened levels present immediate challenges, with potential depletion of the  
320 physiotherapy workforce intensifying pressure on existing staff. Secondly, burnout has been  
321 linked to higher turnover rates among staff.<sup>26</sup> Given the existing shortage of physiotherapists  
322 in the UK, the high levels of burnout in this study may be a contributing factor to a significant

323 exodus from the profession.<sup>27</sup> Our findings not only underscore the severity of burnout-related  
324 issues but also offer a potential explanation for the scarcity of physiotherapists in the UK.  
325 Individuals can encounter challenges, such as impaired executive function, compromised  
326 episodic and working memory, and diminished task attention when facing burnout.<sup>28</sup> With  
327 appropriate intervention, these issues can be reversed.<sup>29</sup> Our examination of burnout  
328 dimensions reveals both physical and emotional exhaustion scores on average fall between  
329 medium and high. In a study by Brand et al<sup>30</sup>, 21.1% of health professionals with high burnout  
330 scores experienced insomnia. Given sleep deprivation adversely affects attention, working  
331 memory, long-term memory, and decision-making<sup>31</sup>, it may explain why these symptoms have  
332 been reported as risk factors in burnout research.<sup>29</sup> It is then logical to infer insomnia might be  
333 prevalent among UK physiotherapists, given the burnout scores observed in our sample. As a  
334 result, despite experiencing exhaustion, achieving restful sleep may be elusive due to the  
335 coexistence of insomnia. If physiotherapists are indeed dealing with insomnia, the quality of  
336 care provided may be compromised, posing additional health risks to their patients.

337 Given that this study represents one of the first to capture burnout in a sample of UK  
338 physiotherapists, with such stark results, urgent and comprehensive efforts are required to  
339 mitigate the impending risks to staff, patients, and the broader society. Understanding the  
340 reasons behind the increase in burnout rates requires further exploration.

### 341 [Perfectionism and Burnout](#)

342 On average, we observed moderate to high levels of SOP and SPP in our physiotherapy  
343 population. Correlational analysis reveals a connection between SPP, SOP, and moral injury  
344 and burnout. Further analysis indicates a positive association between both SPP and moral  
345 injury with burnout. The self-induced external perfectionistic standards appear to be the closest  
346 predictor of burnout. In practical terms, this connection could manifest when a physiotherapist

347 achieves a set goal, but external hierarchical peers may fail to provide sufficient feedback that  
348 meets the perfectionistic standards of the feedback-reciprocal physiotherapist. Consequently,  
349 the physiotherapist, in such cases, becomes vulnerable to experiencing elevated levels of  
350 burnout.

351 Our findings align with previous research identifying SPP as a stronger predictor of burnout  
352 compared to SOP.<sup>21</sup> Recently, Biggs McKay and Shanmugam<sup>21</sup> found a significant association  
353 between SPP and burnout in UK physiotherapy students, suggesting a consistent trend across  
354 different professional stages. Our findings also contribute to a growing body of evidence  
355 linking perfectionism, particularly SPP, to adverse health implications. SPP demonstrates a  
356 stronger direct relationship with clinically diagnosed conditions, including affective  
357 disorders, eating disorders, and narcissistic personality disorder.<sup>5</sup> The relationship between  
358 SPP and burnout observed in our sample underscores the importance of recognising and  
359 addressing maladaptive perfectionism tendencies, as they can have significant implications for  
360 individual health and well-being.

### 361 [Moral Injury and Burnout](#)

362 Mantri et al<sup>32</sup>, in their sample of 1831 health professionals, found a significant relationship  
363 between moral injury and burnout. The authors understood the surge in rates of moral injury  
364 found in their data to be in response to the pandemic. On average, our sample consisted of  
365 moderate levels of moral injury. Further analysis revealed a significant correlation between  
366 burnout and moral injury, similar to previous research<sup>13</sup> and the understanding that burnout  
367 might not be due to pandemic related factors alone.<sup>32</sup> SEM helped us establish a significant  
368 association, with moral injury predicting burnout ( $\beta$  0.78). Our study stands as the first to  
369 uncover such an association in the physiotherapy profession. Building on the work of Mantri

370 et al<sup>32</sup>, we found moral injury can predict burnout, and when combined with perfectionism, it  
371 explains 62% of the variance in burnout scores.

372 Our study is the first to establish a relationship between SPP and moral injury ( $\beta$  0.54). We  
373 theorise the external standards set by significant others could trigger a sense of betrayal,  
374 subsequently leading to moral injury. Our results support this association. Considering the  
375 mean SPP score in our sample is moderate to high, it implies that physiotherapists are striving  
376 for standards of perfection as influenced by their peers. However, this pursuit may render them  
377 susceptible to moral injury if perceived betrayal from significant peers, such as line managers  
378 or superiors, occurs. This vulnerability likely predisposes physiotherapists to a risk of elevated  
379 levels of burnout.

### 380 [Perfectionism, Moral Injury and Burnout's Pathway](#)

381 This study marks the first instance where the relationship between perfectionism and burnout  
382 is elucidated from the perspective of a betrayal of values. The SEM results extend the findings  
383 of Martin et al<sup>20</sup> and Testoni et al<sup>13</sup>, underscoring the susceptibility to burnout exhibited by SPP  
384 physiotherapists when confronted with moral injury. SPP was not the only domain on the MPS-  
385 SF to have a relationship with burnout. A relationship between SOP and burnout, observed  
386 through SEM, was not significantly associated by moral injury, despite a modest association  
387 between the two ( $\beta$  0.27). Our research suggests SOP has a detrimental relationship with  
388 burnout, explaining some of the variance in scores. Logically, it becomes evident that SOP  
389 correlates with the three dimensions of burnout (see Table 3), exposing individuals to  
390 heightened exhaustion and cognitive weariness as they strive to meet the impeccable standards  
391 they set for themselves.

## 392 Practical Implications

393 Our research underscores the importance of the interplay between perfectionism and moral  
394 injury for physiotherapists and their line managers. Although our research focuses on a  
395 physiotherapy population, high burnout levels are likely not unique to the profession and it can  
396 be expected to be found across other health professionals. Burnout, as such, can be considered  
397 a ‘wicked’ problem and of great concern to the sustainability of the NHS workforce. Challenges  
398 such as workload pressures, budget constraints, staff shortages and patient wait times would be  
399 and are increasing due to the sustainability of the practitioners in physiotherapy. Strategies  
400 need to be developed to manage risk factors to burnout and support those impacted by the  
401 syndrome at a national level. Creating these strategies will likely benefit from a collaborative  
402 effort between key stakeholders interested in supporting the mental health and job satisfaction  
403 of health care workers, including the healthcare workers affected. For example, the use of co-  
404 creation methodologies may facilitate interventions that are realistic, person-centred, and  
405 achievable.

## 406 Limitations and Future Research Directions

407 Although our study can explain around 60% of the variance of burnout in physiotherapists,  
408 other influences of the remaining 40% remain unknown. We also cannot fully understand the  
409 experience of burnout for physiotherapists through their survey response. For example, some  
410 physiotherapists may leave the workforce due to burnout while some may persevere or use  
411 unknown coping strategies to continue in their post. Understanding the experience of burnout  
412 would help inform the creation of strategies. It is also unknown if the adaptation of the Likert  
413 scales used in the survey reduced the level of detail in participant scores. For example, with  
414 fewer points on the scale, we may have missed small differences in burnout level between

415 participants. However, it is also unclear how much this other detail would have contributed to  
416 our understanding and evaluation of the problem.

417 Naturally with most surveys, participant answers are subjective, vulnerable to over or  
418 underestimation, and only offer us a time snapshot of perfectionism, moral injury, and burnout  
419 in UK-based physiotherapists. We cannot understand if these rates are static, vary over the  
420 course of the year, or if they still remain high at nearly one year after the start of data collection.  
421 Future research may wish to explore how burnout changes over time, with intervention, and  
422 across different health professions. Nonetheless, the results may be generalisable to an extent  
423 as burnout can be observed in physicians and medical doctors and thus the path of  
424 perfectionism-moral injury-burnout may also be present in these populations too.<sup>20</sup>

425 In this publication, we focused on the role of SOP and SPP and their relationship with moral  
426 injury and burnout. It may also be of interest to understand the role of OOP. OOP describes  
427 behaviours related to the placement of high standards on others. As we know these standards  
428 negatively impact physiotherapists with expectations of perfection placed upon them by others,  
429 an understanding of the prevalence of OOP may help inform strategies to reduce toxic  
430 behaviours in team dynamics and the wider profession. It may also prove informative to explore  
431 sleep hygiene practices and sleep quality in the profession to better understand the connection  
432 of insomnia with burnout.

## 433 Conclusion

434 This study offers valuable insights into the intricate dynamics among perfectionism, moral  
435 injury, and burnout, emphasising that moral injury acts as a pivotal mediator in the relationship  
436 between SPP and burnout. The collective influence of perfectionism and moral injury emerges  
437 as a robust predictor of burnout in physiotherapists. Importantly, our findings contribute to the

438 growing body of evidence highlighting the health risks associated with SPP across diverse  
439 populations.

440 The unprecedented levels of burnout observed in UK-based physiotherapists, as revealed by  
441 our study, underscore a critical concern with far-reaching implications. This high prevalence  
442 of burnout has the potential to impact not only the well-being of physiotherapy professionals  
443 but also poses risks to patient care, staff dynamics, and the broader society. The implications  
444 extend beyond individual practitioners to the healthcare ecosystem as a whole.

445 In essence, this study highlights the urgent need for targeted and systemic interventions along  
446 with comprehensive strategies to address the pervasive challenges posed by perfectionism,  
447 moral injury, and burnout within the field of physiotherapy. Acknowledging and actively  
448 mitigating these issues is imperative for fostering a resilient and sustainable healthcare  
449 workforce, ultimately enhancing the quality of patient care and safeguarding the well-being of  
450 both physiotherapists and the communities they serve.

## 451 [Acknowledgements](#)

452 This work praises the time and effort spent by the Physiotherapists in the UK. The project did  
453 not acquire funding to undertake.

## 454 [Reference List](#)

455 (1) Flett GL, Hewitt, PL. *Perfectionism: Theory, research, and treatment*. American Psychological  
456 Association: 2002. Chapter 1, Perfectionism and maladjustment: An overview of theoretical,  
457 definitional, and treatment issues; p. 5-31.

458 (2) Frost RO, Marten P, Lahart C, Rosenblate R. The dimensions of perfectionism. *Cognitive*  
459 *therapy and research* 1990;14:449-468.



- 460 (3) Hewitt PL, Flett GL. Dimensions of perfectionism in unipolar depression. *J Abnorm*  
461 *Psychol* 1991;100(1):98
- 462 (4) Cox BJ, Enns MW, Clara IP. The multidimensional structure of perfectionism in  
463 clinically distressed and college student samples. *Psychol Assess* 2002;14(3):365.
- 464 (5) Flett GL, Hewitt PL, Nepon T, Sherry SB, Smith M. The destructiveness and public health  
465 significance of socially prescribed perfectionism: A review, analysis, and conceptual extension.  
466 *Clin Psychol Rev* 2022;93:102130.
- 467 (6) Chartered Society of Physiotherapy. 2017. *CSP facts and figures*. Available:  
468 <https://www.csp.org.uk/about-csp/who-we-are/facts-figures> [Accessed 09.01/2024].
- 469 (7) Shay J. Achilles: Paragon, Flawed Character, or Tragic Soldier Figure? *The Classical*  
470 *Bulletin* 1995;71(2):117
- 471 (8) Shay J. Moral injury. *Psychoanalytic psychology* 2014;31(2):182.
- 472 (9) Brock RN, Lettini G. *Soul repair: Recovering from moral injury after war.*: Beacon Press;  
473 2012.
- 474 (10) Dean W, Talbot S, Dean A. Reframing clinician distress: moral injury not burnout.  
475 *Federal Practitioner* 2019;36(9):400.
- 476 (11) Whitehead PB, Herbertson RK, Hamric AB, Epstein EG, Fisher JM. Moral distress  
477 among healthcare professionals: Report of an institution-wide survey. *Journal of nursing*  
478 *scholarship* 2015;47(2):117-125.
- 479 (12) Čartolovni A, Stolt M, Scott PA, Suhonen R. Moral injury in healthcare professionals: A  
480 scoping review and discussion. *Nurs Ethics* 2021;28(5):590-602.

- 481 (13) Testoni I, Brondolo E, Ronconi L, Petrini F, Navalesi P, Antonellini M, et al. Burnout  
482 following moral injury and dehumanization: A study of distress among Italian medical staff  
483 during the first COVID-19 pandemic period. *Psychological Trauma: Theory, Research,*  
484 *Practice, and Policy* 2022; 15(Suppl 2).
- 485 (14) Williams ES, Rathert C, Buttigieg SC. The personal and professional consequences of  
486 physician burnout: a systematic review of the literature. *Medical Care Research and Review*  
487 2020;77(5):371-386.
- 488 (15) Maslach, C., Jackson, S. (1984), Burnout in organization settings. *Applied Social*  
489 *Psychology Annual*, 5(1), 133-153.
- 490 (16) Lundgren-Nilsson Å, Jonsdottir IH, Pallant J, Ahlborg G. Internal construct validity of  
491 the Shirom-Melamed burnout questionnaire (SMBQ). *BMC Public Health* 2012;12:1-8.
- 492 (17) Gustafsson H, Kenttä G, Hassmén P. Athlete burnout: An integrated model and future  
493 research directions. *International Review of Sport and Exercise Psychology* 2011;4(1):3-24.
- 494 (18) Donohoe E, Nawawi A, Wilker L, Schindler T, Jette DU. Factors associated with burnout  
495 of physical therapists in Massachusetts rehabilitation hospitals. *Phys Ther* 1993;73(11):750-  
496 756.
- 497 (19) Bejer A, Domka-Jopek E, Probachta M, Lenart-Domka E, Wojnar J. Burnout syndrome  
498 in physiotherapists working in the Podkarpackie province in Poland. *Work* 2019;64(4):809-815.
- 499 (20) Martin SR, Fortier MA, Heyming TW, Ahn K, Nichols W, Golden C, et al.  
500 Perfectionism as a predictor of physician burnout. *BMC Health Services Research*  
501 2022;22(1):1425.
- 502 (21) Biggs, P. D, McKay, J., Shanmugam, S. Academic Burnout and Perfectionism in UK-  
503 based Physiotherapy Students. *Advances in Health Sciences Education* 2024 Forthcoming.

- 504 (22) Mantri S, Song YK, Lawson JM, Berger EJ, Koenig HG. Moral injury and burnout in  
505 health care professionals during the COVID-19 pandemic. *J Nerv Ment Dis* 2021;209(10):720-  
506 726.
- 507 (23) Shirom A, Melamed S. A comparison of the construct validity of two burnout measures  
508 in two groups of professionals. *International journal of stress management* 2006;13(2):176.
- 509 (24) Anderson JC, Gerbing DW. Structural equation modeling in practice: A review and  
510 recommended two-step approach. *Psychol Bull* 1988;103(3):411.
- 511 (25) Marsh HW, Hau K, Wen Z. In search of golden rules: Comment on hypothesis-testing  
512 approaches to setting cutoff values for fit indexes and dangers in overgeneralizing Hu and  
513 Bentler's (1999) findings. *Structural equation modeling* 2004;11(3):320-341.
- 514 (26) Willard-Grace R, Knox M, Huang B, Hammer H, Kivlahan C, Grumbach K. Burnout and  
515 health care workforce turnover. *The Annals of Family Medicine* 2019;17(1):36-41.
- 516 (27) Dolton, P., Nguyen, D., Castellanos, M., & Rolfe, H. 2018. BREXIT and the Health &  
517 Social Care Workforce in the UK. Available: [https://www.niesr.ac.uk/wp-](https://www.niesr.ac.uk/wp-content/uploads/2021/10/Report-Brexit-Health-and-Social-Care-Workforce-Full-Report-4.pdf)  
518 [content/uploads/2021/10/Report-Brexit-Health-and-Social-Care-Workforce-Full-Report-](https://www.niesr.ac.uk/wp-content/uploads/2021/10/Report-Brexit-Health-and-Social-Care-Workforce-Full-Report-4.pdf)  
519 [4.pdf](https://www.niesr.ac.uk/wp-content/uploads/2021/10/Report-Brexit-Health-and-Social-Care-Workforce-Full-Report-4.pdf) [Accessed 07/01/2024]
- 520 (28) Jonsdottir IH, Nordlund A, Ellbin S, Ljung T, Glise K, Währborg P, et al. Working  
521 memory and attention are still impaired after three years in patients with stress-related  
522 exhaustion. *Scand J Psychol* 2017;58(6):504-509.
- 523 (29) Bayes A, Tavella G, Parker G. The biology of burnout: Causes and consequences. *The*  
524 *World Journal of Biological Psychiatry* 2021;22(9):686-698.
- 525 (30) Brand S, Beck J, Hatzinger M, Harbaugh A, Ruch W, Holsboer-Trachsler E.  
526 Associations between satisfaction with life, burnout-related emotional and physical

- 527 exhaustion, and sleep complaints. *The World Journal of Biological Psychiatry*  
528 2010;11(5):744-754.
- 529 (31) Alhola P, Polo-Kantola P. Sleep deprivation: Impact on cognitive performance.  
530 *Neuropsychiatric disease and treatment* 2007;3(5):553-567.
- 531 (32) Mantri S, Song YK, Lawson JM, Berger EJ, Koenig HG. Moral injury and burnout in  
532 health care professionals during the COVID-19 pandemic. *J Nerv Ment Dis*  
533 2021;209(10):720-726.
- 534

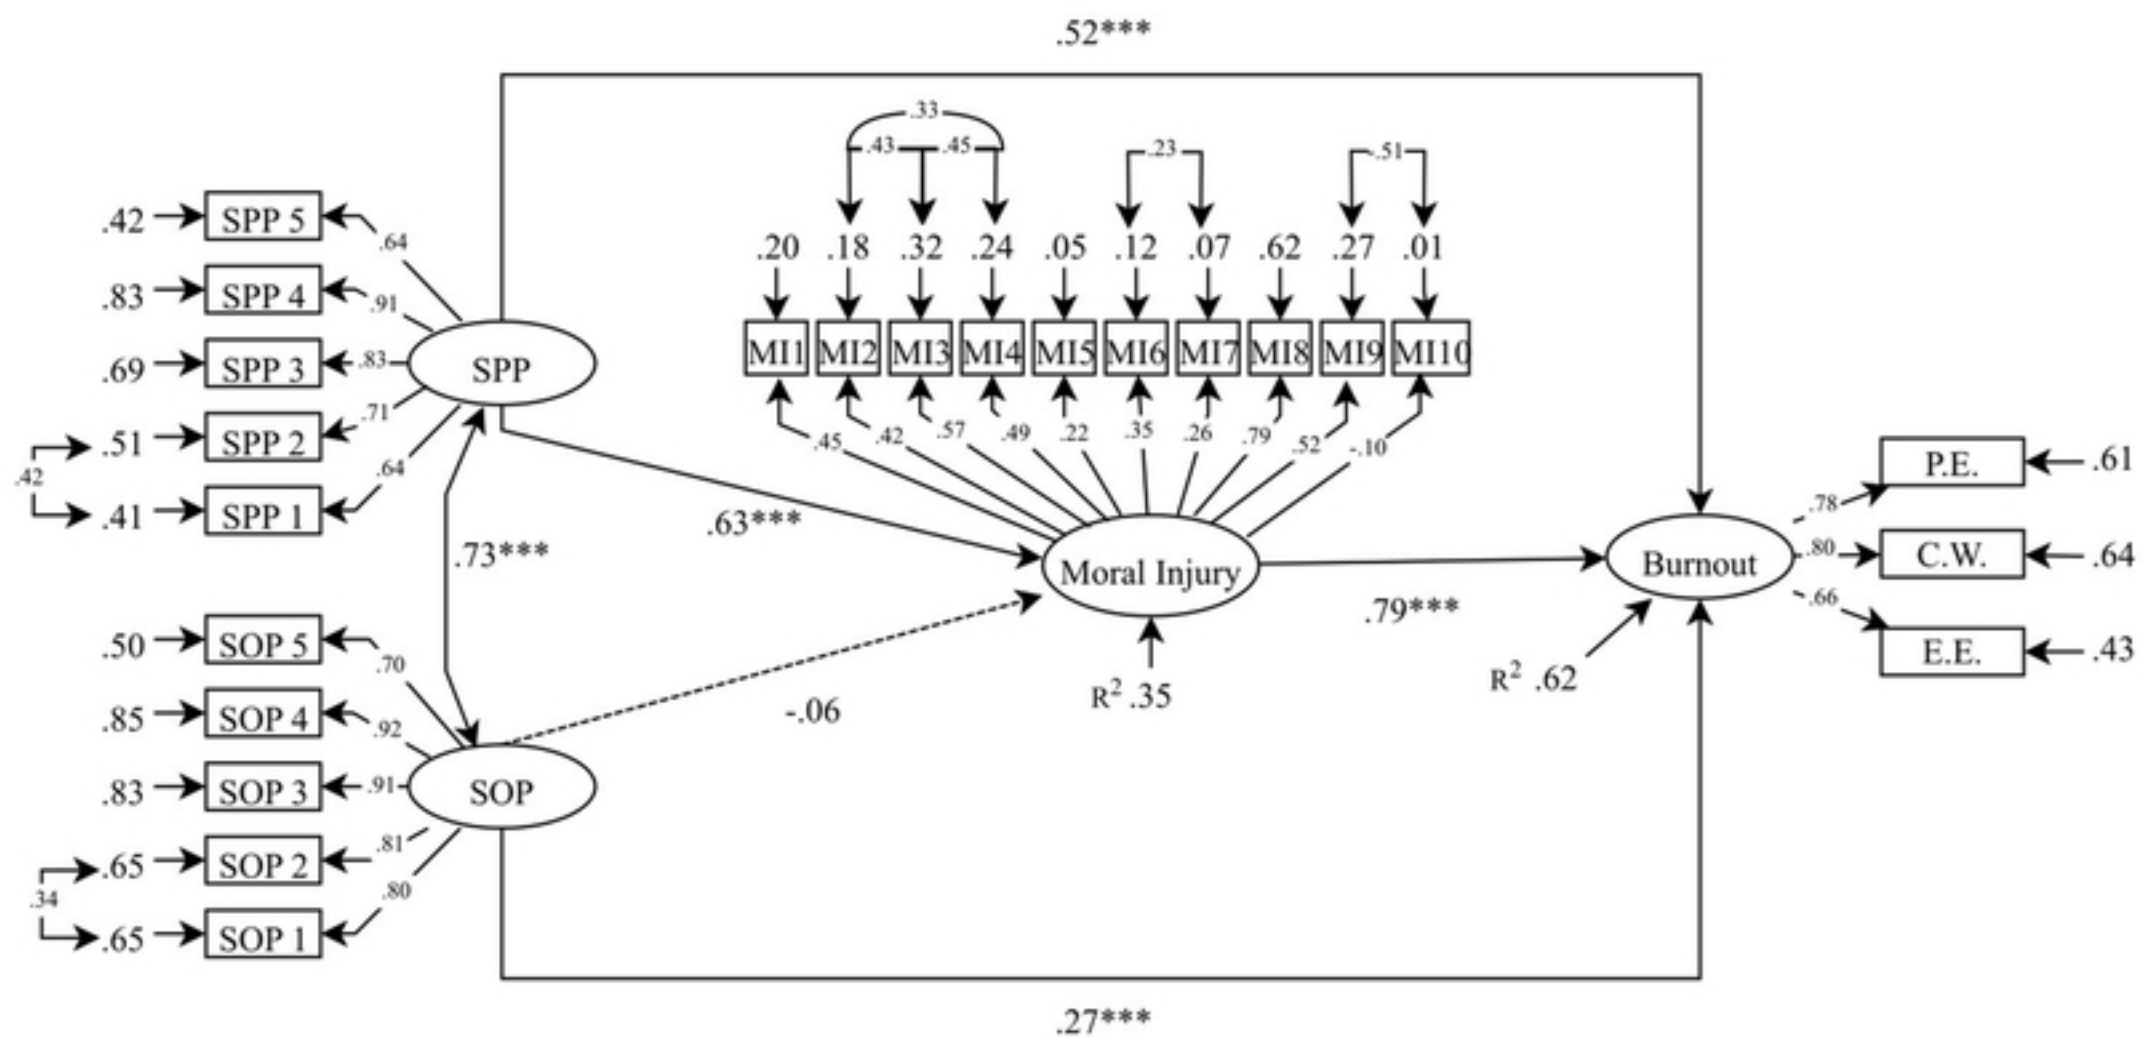

Figure 1
